# Supplementary material for: miR-331-3p and Aurora Kinase inhibitor II co-treatment suppresses prostate cancer tumorigenesis and progression
Source: PubMed Central journal article supplement (PMC5589646; doi:10.18632/oncotarget.18664), 2017-06-27
Supplement: oncotarget-08-55116-s001.pdf [file oncotarget-08-55116-s001.pdf]

# miR-331-3p and Aurora Kinase inhibitor II co-treatment suppresses prostate cancer tumorigenesis and progression

## SUPPLEMENTARY FIGURES AND TABLES

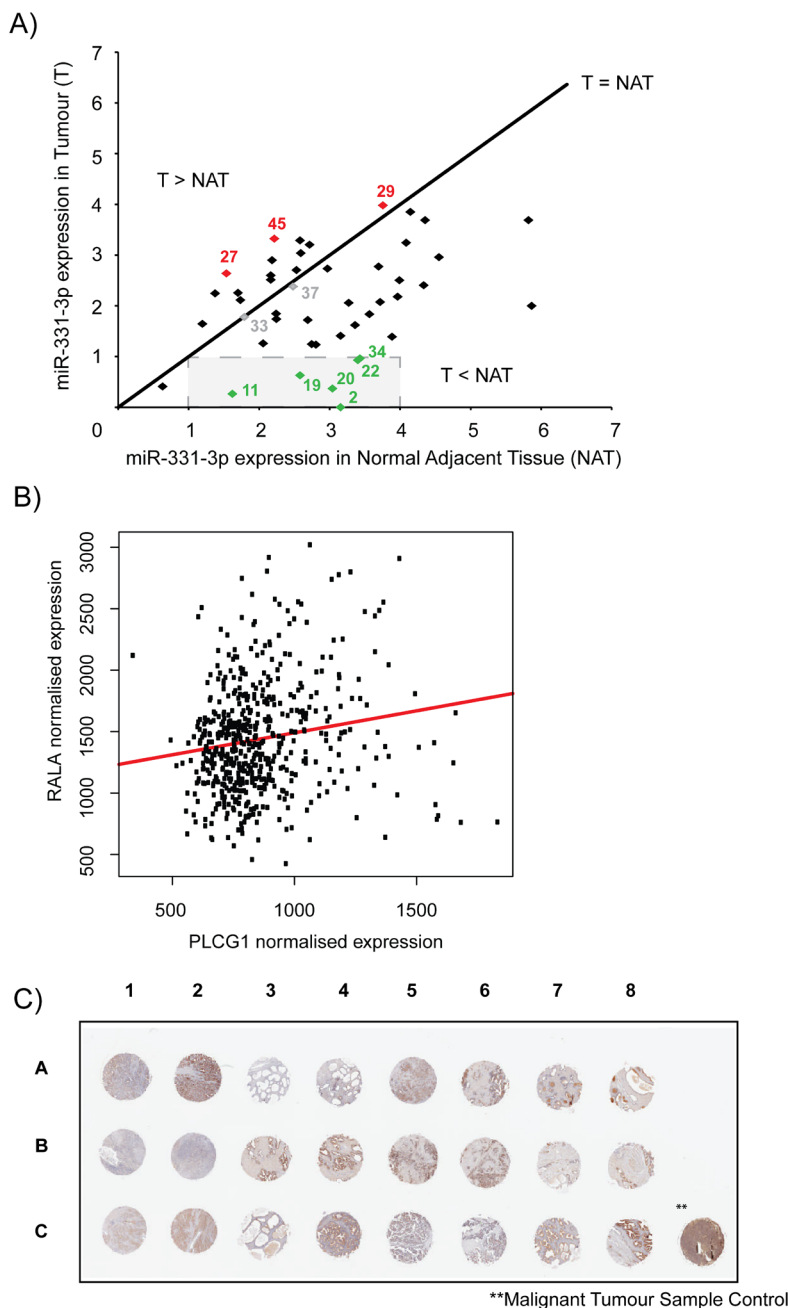

**Supplementary Figure 1:** (A, B) Scatter plot of the expression ratio of miR-331-3p in Normal Adjacent Tissue (NAT) vs tumour (T) samples. Continuous mid-point line indicates ratio where miR-331-3p expression in NAT is approximately equal to T (ie. T/NAT = 1). Samples below the line are representative of higher miR-331-3p expression in NAT vs matched T tissue. Sample pairs used in analysis at extremities are numbered accordingly and coloured red, grey or green. (B) Correlation between RALA and PLCγ1 expression within TCGA PCa cohorts. (C) RALA stained tissue microarray slide. Annotations are described in Supplementary Table 1.

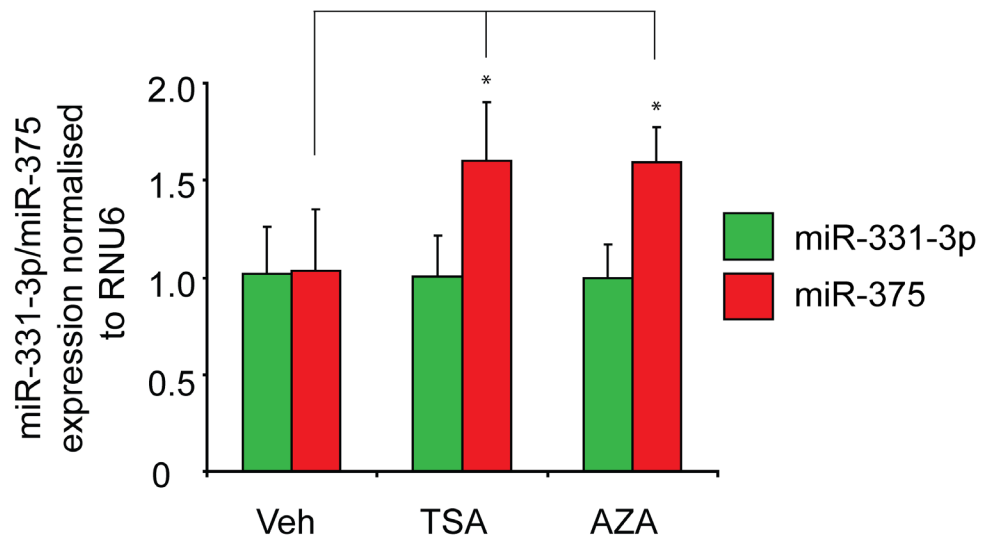

**Supplementary Figure 2:** (A) LNCaP PCa cells were treated with TSA (Trichostatin A) and 5-aza-2'-deoxycytidine (AZA) and the miR-331-3p and miR-375 transcripts were investigated using Taqman qRT-PCR. Error bars = SD; \*p<0.05.

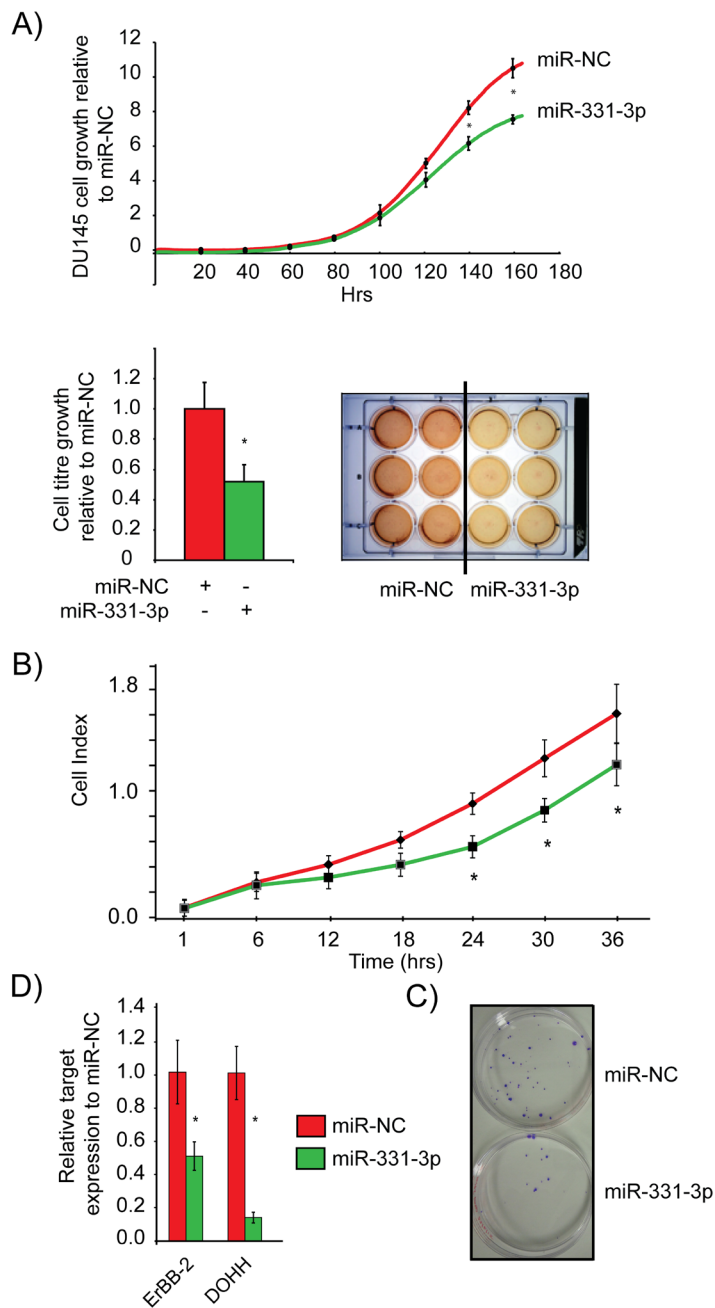

**Supplementary Figure 3: miR-331-3p over expression has negative effects on proliferation, migration and colony formation of DU145 PCa cells.** (A) DU145 cells were transiently transfected with miR-NC or miR-331-3p and their proliferation cell indexes were measured in real time or end point cell titre assays for 160 hours. (B) DU145 cells were transiently transfected in with miR-NC or miR-331-3p and their migration cell indexes were measured in real time for 36 hours. (C) Colony formation of DU145 miRNC or DU145 miR-331-3p cells visualized 3 weeks post seeding at 1000 cells/plate. (D) qPCR analysis of miR-331-3p specific targets confirmed their down regulation (\* p<0.05).

Supplementary Table 1: Annotation of Tissue Microarray Slide (PR243a; US Biomax)

| Pos | No. | Age | Pathology diagnosis                  | Grade | Gleason Grade | Gleason Score | TNM     | Type †    |
|-----|-----|-----|--------------------------------------|-------|---------------|---------------|---------|-----------|
| A1  | 1   | 69  | Adenocarcinoma                       | 3     | 4             | 3+4           | T2NxM0  | Malignant |
| A2  | 2   | 69  | Adenocarcinoma                       | 3     | 4             | 3+5           | T2NxM0  | Malignant |
| A3  | 3   | 73  | NAT                                  | –     | –             | –             | –       | NAT       |
| A4  | 4   | 73  | NAT                                  | –     | –             | –             | –       | NAT       |
| A5  | 5   | 60  | Adenocarcinoma                       | 1     | 2             | 2+1           | T4N1M1c | Malignant |
| A6  | 6   | 60  | Adenocarcinoma                       | 1     | 2             | 2+1           | T4N1M1c | Malignant |
| A7  | 7   | 77  | NAT                                  | –     | –             | –             | –       | NAT       |
| A8  | 8   | 77  | NAT                                  | –     | –             | –             | –       | NAT       |
| B1  | 9   | 64  | Adenocarcinoma<br>(prostatic tissue) | –     | –             | –             | T2NxM0  | Malignant |
| B2  | 10  | 64  | Adenocarcinoma                       | 2     | 2             | 2+3           | T2NxM0  | Malignant |
| B3  | 11  | 27  | NAT                                  | –     | –             | –             | –       | NAT       |
| B4  | 12  | 27  | NAT                                  | –     | –             | –             | –       | NAT       |
| B5  | 13  | 64  | Adenocarcinoma                       | 2–3   | 3             | 3+4           | T3NxM1b | Malignant |
| B6  | 14  | 64  | Adenocarcinoma                       | 2–3   | 3             | 3+4           | T3NxM1b | Malignant |
| B7  | 15  | 84  | NAT                                  | –     | –             | –             | –       | NAT       |
| B8  | 16  | 84  | NAT                                  | –     | –             | –             | –       | NAT       |
| C1  | 17  | 75  | Adenocarcinoma                       | 1     | 1             | 1+2           | T2N1M1c | Malignant |
| C2  | 18  | 75  | Adenocarcinoma                       | 1     | 1             | 1+3           | T2N1M1c | Malignant |
| C3  | 19  | 80  | NAT                                  | –     | –             | –             | –       | NAT       |
| C4  | 20  | 80  | NAT                                  | –     | –             | –             | –       | NAT       |
| C5  | 21  | 75  | Adenocarcinoma                       | 2     | 3             | 3+3           | T4N1M1b | Malignant |
| C6  | 22  | 75  | Adenocarcinoma                       | 2     | 3             | 3+4           | T4N1M1b | Malignant |
| C7  | 23  | 21  | NAT                                  | –     | –             | –             | –       | NAT       |
| C8  | 24  | 21  | NAT                                  | –     | –             | –             | –       | NAT       |
| –   | –   | 58  | Malignant Melanoma                   | –     | –             | –             | –       | Malignant |

**Supplementary Table 2: Down regulated gene list from LNCaP miRNA array (Figure 3A) Genes are ranked from greatest down regulation to least, constrained at -1.5 fold**

See Supplementary File 1

**Supplementary Table 3: Bliss Independence Model values for calculating synergy/additivity Synergy is concluded if  $E_{\text{Observed}} < E_{\text{Bliss}}$  and Additivity if  $E_{\text{Observed}} > E_{\text{Bliss}}$**

| Treatment                  | Colonies (CFU) |                             | Values   |
|----------------------------|----------------|-----------------------------|----------|
| <i>miR-NC</i>              | 66.667         |                             |          |
| <i>miR-NC + AKi-II</i>     | 11             | <b>Ea</b>                   | 0.165414 |
| <i>miR-331-3p</i>          | 31             | <b>Eb</b>                   | 0.466166 |
| <i>miR-331-3p + AKi-II</i> | 6.667          | <b>E<sub>Observed</sub></b> | 0.097744 |
|                            |                | <b>E<sub>Bliss</sub></b>    | 0.554470 |

**Supplementary Table 4: Bliss Independence Model values for calculating synergy/additivity Synergy is concluded if  $E_{\text{Observed}} < E_{\text{Bliss}}$  and Additivity if  $E_{\text{Observed}} > E_{\text{Bliss}}$**

| Treatment                     | Colonies (CFU) |                             | Values   |
|-------------------------------|----------------|-----------------------------|----------|
| <i>si-NC</i>                  | 101.667        |                             |          |
| <i>si-NC + AKi-II</i>         | 35             | <b>Ea</b>                   | 0.344828 |
| <i>si-RALA S11760</i>         | 45.333         | <b>Eb</b>                   | 0.448276 |
| <i>si-RALA S11760+ AKi-II</i> | 16.333         | <b>E<sub>Observed</sub></b> | 0.162562 |
|                               |                | <b>E<sub>Bliss</sub></b>    | 0.638526 |

**Supplementary Table 5: Bliss Independence Model values for calculating synergy/additivity Synergy is concluded if  $E_{\text{Observed}} < E_{\text{Bliss}}$  and Additivity if  $E_{\text{Observed}} > E_{\text{Bliss}}$**

| Treatment                            | Volume (mm <sup>3</sup> ) | Standard Deviation | Normalised to miR-NC |                             | Values   |
|--------------------------------------|---------------------------|--------------------|----------------------|-----------------------------|----------|
| <i>miR-NC</i>                        | 1268.008                  | 148.0526           | 1.0                  |                             |          |
| <i>miR-NC</i> +<br><i>AKi-II</i>     | 1085.11                   | 165.0668           | 0.85576              | <b>Ea</b>                   | 0.14424  |
| <i>miR-331-3p</i>                    | 1083.779                  | 173.5856           | 0.85471              | <b>Eb</b>                   | 0.14529  |
| <i>miR-331-3p</i> +<br><i>AKi-II</i> | 685.7656                  | 112.6894           | 0.540821             | <b>E<sub>Observed</sub></b> | 0.459179 |
|                                      |                           |                    |                      | <b>E<sub>Bliss</sub></b>    | 0.268574 |
